# Supplementary material for: A bioinspired porous and electroactive reduced graphene oxide hydrogel based biosensing platform for efficient detection of tumor necrosis factor-α
Source: Royal Society of Chemistry journal article supplement (doi:10.1039/d4tb01216j), 2024-01-01
Supplement: d4tb01216j1.pdf [file d4tb01216j1.pdf]

## **Supporting Information (SI)**

### **Bioinspired porous and electroactive reduced graphene oxide hydrogel based biosensing platform for efficient detection of Tumor Necrosis Factor- $\alpha$**

Parth Kapil<sup>1#</sup>, Damini Verma<sup>1#</sup>, Rangadhar Pradhan<sup>1\*</sup>, Ashish Kalkal<sup>3,4\*</sup>, Gopinath Packirisamy<sup>1,2\*</sup>

<sup>1</sup>Centre for Nanotechnology, Indian Institute of Technology Roorkee, Roorkee, Uttarakhand, 247667, India

<sup>2</sup>Department of Biosciences and Bioengineering, Indian Institute of Technology Roorkee, Roorkee, Uttarakhand, 247667, India

<sup>3</sup>Nanostructured System Laboratory, Department of Mechanical Engineering, University College London, London, WC1E 7JE, UK

<sup>4</sup>Wellcome/EPSRC Centre for Interventional and Surgical Sciences, University College London, London, W1W7TS, UK

# Authors have contributed Equally

\***Corresponding authors:** Ashish Kalkal, Rangadhar Pradhan, Gopinath Packirisamy

Email ID: [a.kalkal@ucl.ac.uk](mailto:a.kalkal@ucl.ac.uk), [rangadhar@gmail.com](mailto:rangadhar@gmail.com), [gopi@bt.iitr.ac.in](mailto:gopi@bt.iitr.ac.in)

## **S1. Chemicals and reagents**

Graphene oxide nano-powder, L-cysteine (L-cys), sodium dihydrogen phosphate monohydrate [NaH<sub>2</sub>PO<sub>4</sub>.H<sub>2</sub>O], disodium hydrogen orthophosphate [Na<sub>2</sub>HPO<sub>4</sub>], sodium chloride [NaCl], sodium hydroxide (NaOH), potassium ferricyanide (K<sub>3</sub>[Fe(CN)<sub>6</sub>]), and potassium ferrocyanide K<sub>4</sub>[Fe(CN)<sub>6</sub>].3H<sub>2</sub>O were obtained from Sisco research laboratories, India. Bovine serum albumin (BSA), 1-ethyl-3-(3-dimethylaminopropyl) carbodiimide (EDC), and N-hydroxy-succinimide (NHS) were sourced from Sigma Aldrich, India. Human Tumor Necrosis Factor- $\alpha$  (TNF- $\alpha$ ) recombinant protein (catalog # RTNFAI) and TNF-  $\alpha$  monoclonal antibody (catalog # 7124-MSM5-P1) were bought from Thermo Fischer Scientific. Artificial saliva (CAS:7732-18-5) was sourced from Nanochemazome. The commercial screen-printed electrodes (ItalSens Gold SPE W1-3) were obtained from PalmSens. All the chemicals used were of high analytical quality and were used as supplied without any additional modification. Phosphate-buffered saline (PBS) solutions of various pH were made using Na<sub>2</sub>HPO<sub>4</sub>.H<sub>2</sub>O and NaH<sub>2</sub>PO<sub>4</sub> in deionized water having a resistivity of 18 M $\Omega$  cm. Saline (0.9% NaCl) was added to the buffer solutions to maintain the osmolarity. All the dilutions of antigen and antibody were made in PBS of pH 7.0 and kept at 4 °C till further use.

## **S2. Instrumentation and characterizations**

The successful reduction of GO to rGO and the formation of the L-cys\_rGO hydrogel were validated using multiple characterization techniques. To investigate the surface modification, such as functional groups and various bonds present in L-cys\_rGO hydrogel, an Agilent Cary 630 Fourier transform infrared spectrometer (FTIR) was utilized. Brunauer-Emmett Teller (BET) analyzer was used to calculate the porosity parameters using the Quantachrome instrument. The morphology of L-cys\_rGO hydrogel was studied by Field emission scanning electron microscopy (Thermo Fischer Apreo S Low vac FESEM and Zeiss Gemini 300

FESEM) at an operating 20 kV potential. To analyze the crystallinity and structure of the hydrogels, TEM analysis was done using High-resolution transmission electron microscopy HR-TEM, JEOL JEM-2200 FS, which was operated at 200 kV. The samples for TEM analysis were prepared by dropping L-cys\_rGO hydrogel powder solution on a carbon copper grid. Electrochemical analysis were done using an Autolab (PGSTAT204) electrochemical analyzer from Metrohm, India. Gold screen printed electrodes (gSPE) were used in the study, which has a three-electrode system with a circular working electrode of gold (4 mm diameter), a silver pseudo-reference electrode, and a counter electrode also made of gold. Electrochemical studies of the electrodes were done in PBS with  $[\text{Fe}(\text{CN})_6]^{3-/4-}$  as the redox coupler.

**Table S1:** Tabular representation of peak current values of different electrodes in CV and DPV response curves

| Electrode                                       | Peak current ( $\mu\text{A}$ ) |        |
|-------------------------------------------------|--------------------------------|--------|
|                                                 | CV                             | DPV    |
| Bare gSPE                                       | 78.61                          | 92.13  |
| L-cys_rGO hydrogel/gSPE                         | 91.34                          | 110.06 |
| anti-TNF- $\alpha$ /L-cys_rGO hydrogel/gSPE     | 87.68                          | 83.63  |
| BSA/anti-TNF- $\alpha$ /L-cys_rGO hydrogel/gSPE | 77.88                          | 65.10  |

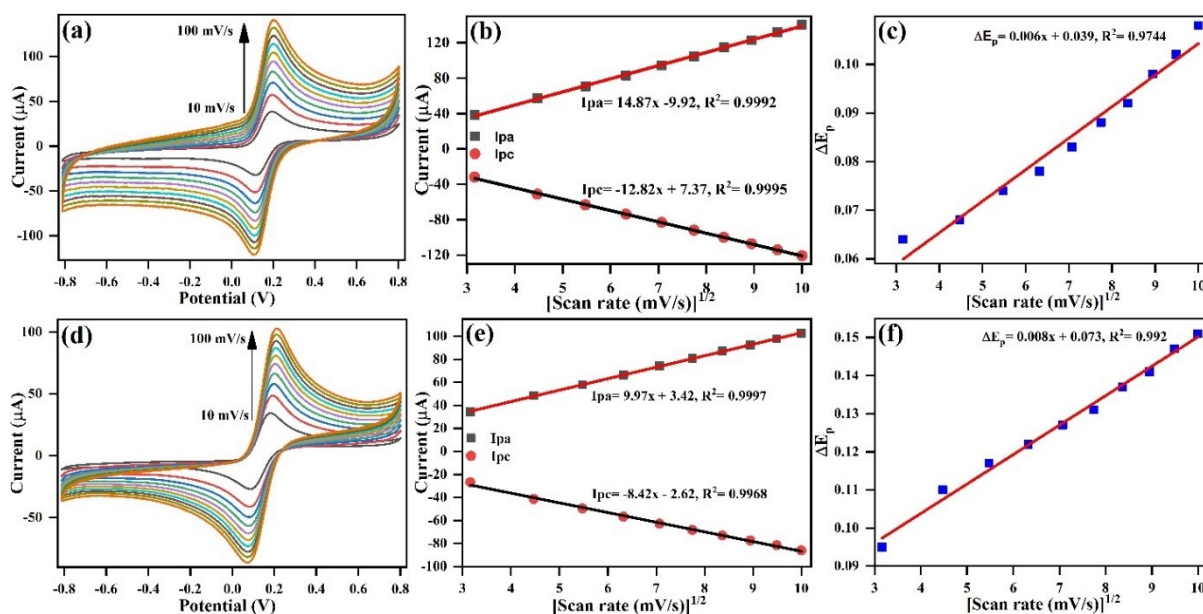

**Fig. S1:** Scan rate studies of (a) L-cys\_rGO hydrogel/gSPE electrodes and (d) BSA/anti-TNF- $\alpha$ /L-cys\_rGO hydrogel/gSPE electrode in PBS. I<sub>pa</sub> and I<sub>pc</sub> peak current curves of (b) L-cys\_rGO hydrogel/gSPE and (e) BSA/anti-TNF- $\alpha$ /L-cys\_rGO hydrogel/gSPE immunosensor, respectively, against the square root of the scan rates. Peak potential changes ( $\Delta E_p$ ) versus square root of the scan rates for (c) L-cys\_rGO hydrogel/gSPE and (f) BSA/anti-TNF- $\alpha$ /L-cys\_rGO hydrogel/gSPE electrode, respectively.

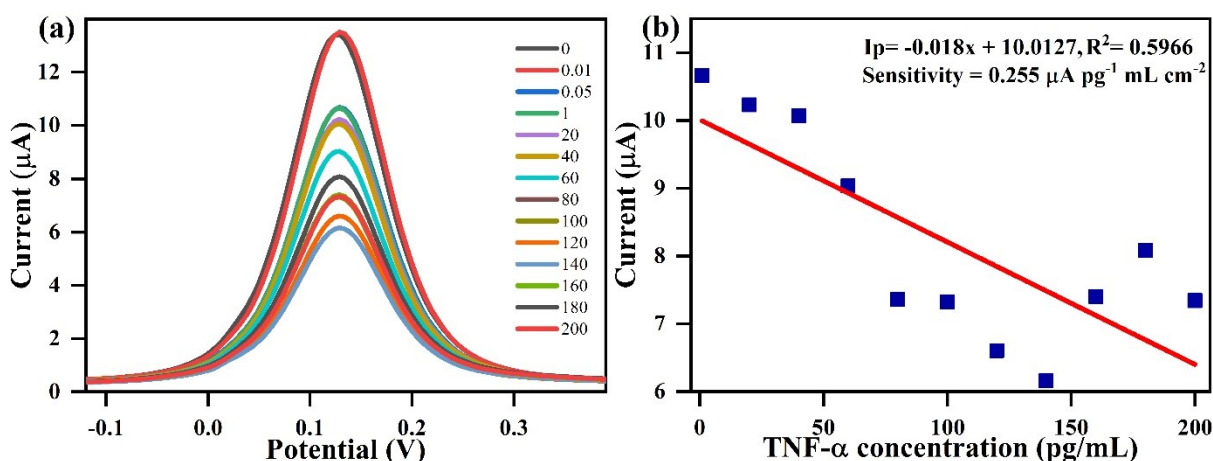

**Fig. S2** Control study depicting (a) the electrochemical response study of the rGO/gSPE against TNF- $\alpha$ . (b) A linear correlation plot of the rGO/gSPE sensor demonstrates the relationship between peak currents and TNF- $\alpha$  concentrations.

**Table. S2:** A spiked sample analysis of the BSA/anti-TNF- $\alpha$ /L-cys\_rGO hydrogel/gSPE immunosensor utilizing distinct TNF- $\alpha$  biomarker concentrations in artificial saliva sample

| <b>TNF-<math>\alpha</math> concentrations</b> | <b>Peak current (<math>\mu</math>A) recorded for standard TNF-<math>\alpha</math></b> | <b>Peak current (<math>\mu</math>A) recorded for artificial saliva spiked TNF-<math>\alpha</math></b> | <b>RSD %</b> | <b>Recovery %</b> |
|-----------------------------------------------|---------------------------------------------------------------------------------------|-------------------------------------------------------------------------------------------------------|--------------|-------------------|
| 0                                             | 77.04                                                                                 | 73.07                                                                                                 | 3.74         | 94.85             |
| 0.01                                          | 67.95                                                                                 | 68.17                                                                                                 | 0.23         | 100.32            |
| 0.05                                          | 61.98                                                                                 | 64.18                                                                                                 | 2.47         | 103.55            |
| 1                                             | 59.34                                                                                 | 57.84                                                                                                 | 1.81         | 97.47             |
| 20                                            | 54.19                                                                                 | 53.72                                                                                                 | 0.62         | 99.13             |
| 40                                            | 50.74                                                                                 | 50.16                                                                                                 | 0.81         | 98.86             |
| 60                                            | 48.13                                                                                 | 46.89                                                                                                 | 1.85         | 97.42             |
| 80                                            | 46.86                                                                                 | 44.23                                                                                                 | 4.08         | 94.39             |
| 100                                           | 43.94                                                                                 | 41.64                                                                                                 | 3.80         | 94.77             |
| 120                                           | 42.05                                                                                 | 39.59                                                                                                 | 4.26         | 94.15             |
| 140                                           | 37.75                                                                                 | 37.59                                                                                                 | 0.30         | 99.58             |
| 160                                           | 36.62                                                                                 | 35.88                                                                                                 | 1.44         | 97.98             |
| 180                                           | 35.22                                                                                 | 34.7                                                                                                  | 1.05         | 98.52             |
| 200                                           | 33.49                                                                                 | 33.8                                                                                                  | 0.65         | 100.92            |
